# Supplementary material for: Direct-synthesis method towards copper-containing periodic mesoporous organosilicas: detailed investigation of the copper distribution in the material
Source: Royal Society of Chemistry journal article supplement (doi:10.1039/c4dt03719g), 2015-01-01
Supplement: c4dt03719g1.pdf [file c4dt03719g1.pdf]

## ELECTRONIC SUPPORTING INFORMATION

# Direct-synthesis method towards copper-containing periodic mesoporous organosilicas: detailed investigation of the copper distribution in the material

Feng Lin,<sup>1,2</sup> Xiangyan Meng,<sup>1</sup> Elena Kukueva,<sup>3</sup> Thomas Altantzis,<sup>3</sup> Myrjam Mertens,<sup>4</sup> Sara Bals,<sup>3</sup> Pegie Cool<sup>1\*</sup> and Sabine Van Doorslaer,<sup>2\*</sup>

1. Laboratory of Adsorption and Catalysis, Department of Chemistry, University of Antwerp, Universiteitsplein 1, B-2610, Wilrijk, Belgium.

2. BIMEF Laboratory, Department of Physics, University of Antwerp, Universiteitsplein 1, B-2610, Wilrijk, Belgium.

3. EMAT, Department of Physics, University of Antwerp, Groenenborgerlaan 171, B-2020 Antwerpen, Belgium

4. Flemish Institute for Technological Research, VITO, Boerentang 200, B-2400, Mol, Belgium

### Corresponding Author

\* Fax: +32 3 2652470; Tel: +32 3 2652461; E-mail: [sabine.vandoorslaer@uantwerpen.be](mailto:sabine.vandoorslaer@uantwerpen.be)

\* Fax: +32 3 2652374; Tel: +32 3 2652355; E-mail: [pegie.cool@uantwerpen.be](mailto:pegie.cool@uantwerpen.be)

1. TEM images of the copper-free PMO material

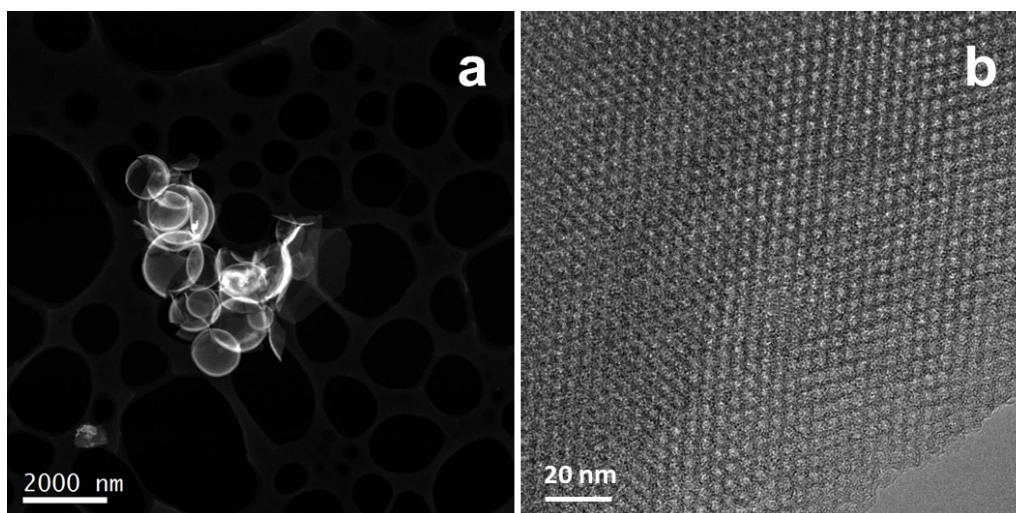

Figure S1. TEM images of solvent-extracted copper-free PMO

2. Different TEM images of the Cu-containing PMO material

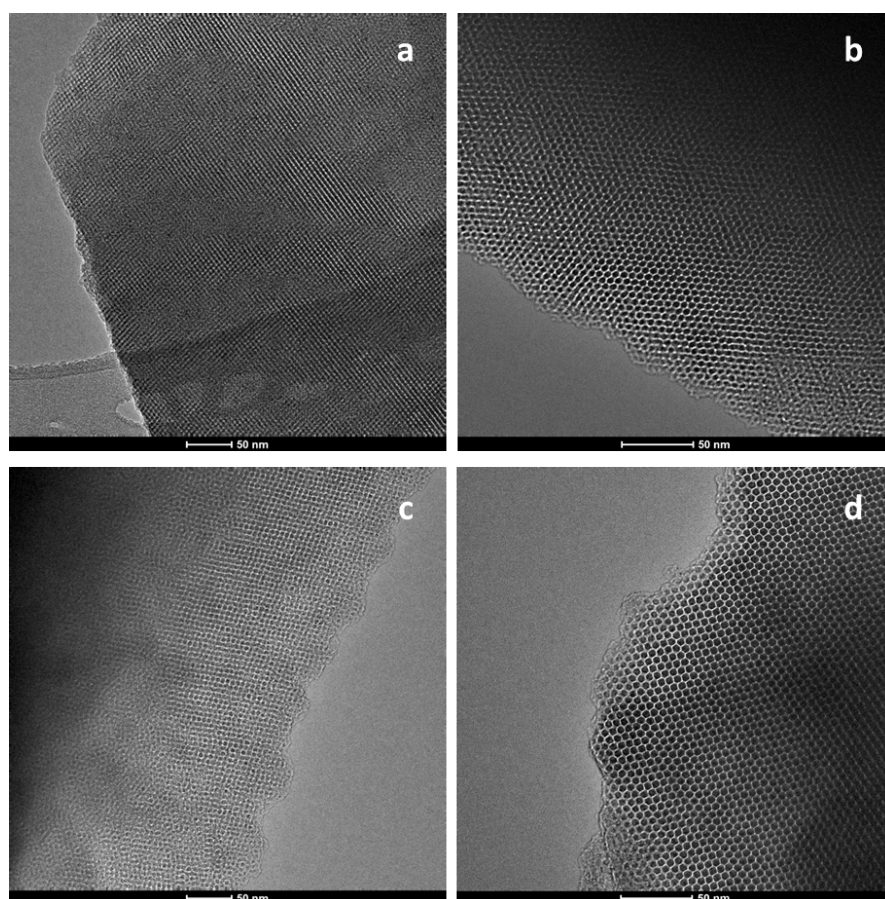

Figure S2. TEM images of (a),(b)0.06Cu-PMO and (c),(d) 0.30Cu-PMO

### 3. The pore-size distribution curves of the PMO materials.

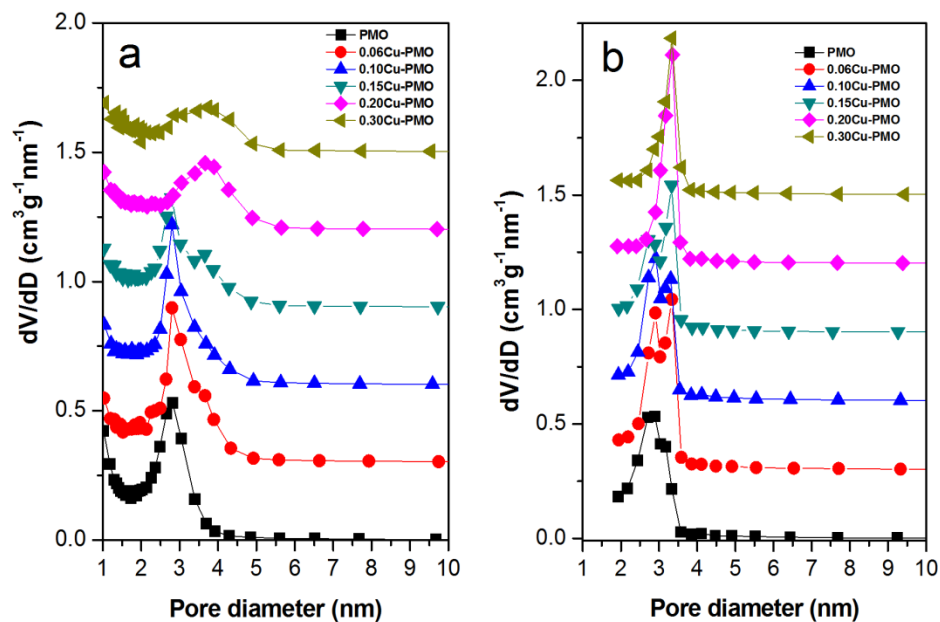

Figure S3. (a) The pore-size distribution curve calculated from the adsorption branch of the  $\text{N}_2$  isotherm, (b) The pore-size distribution curve calculated from the desorption branch of the  $\text{N}_2$  isotherm.

### 4. The representative elemental mapping (Si, O, Cu) of the 0.06Cu-PMO

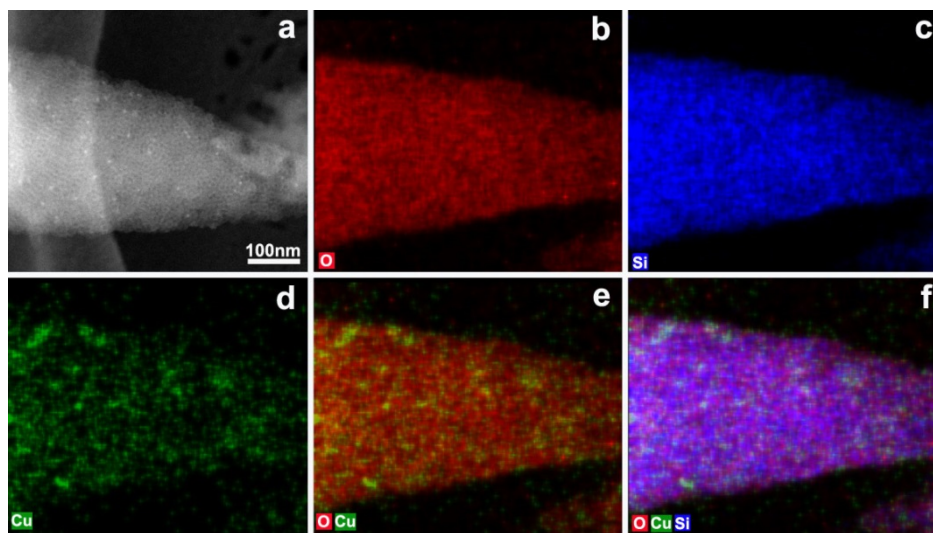

Figure S4. (a) HAADF STEM image of 0.06Cu-PMO, (b-f) elemental mapping of O, Si and Cu with O represented in red, Si in blue and Cu in green.
